# Supplementary material for: A high-performance direct methanolfuel cell with a polymer fiber membrane and RuO2/CNTs as a cathode catalyst
Source: Royal Society of Chemistry journal article supplement (doi:10.1039/c2ta00095d), 2012-11-16
Supplement: c2ta00095d.pdf [file c2ta00095d.pdf]

Electronic Supplementary Information for

**A high-performance direct methanol fuel cell with a polymer fiber**

**membrane and RuO<sub>2</sub>/CNTs as cathode catalyst**

Li Wang, Yongning Liu,\* Xiaodong Yang, Yuan Fang, Yuanzhen Chen and Beiping Wang

State Key Laboratory for Mechanical Behavior of Materials, School of Materials Science and  
Engineering, Xi'an Jiaotong University, Xi'an 710049, PR China

\* E-mail: ynliu@mail.xjtu.edu.cn;

Tel: +86-29-8266-4602 ; fax: +86-29-8266-3453

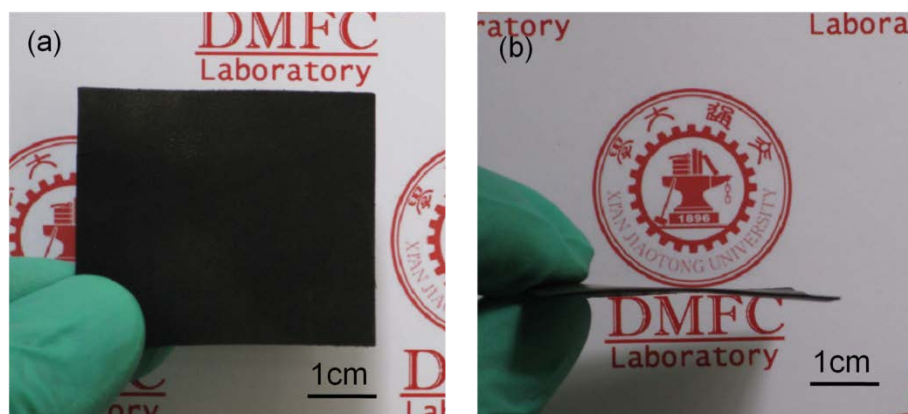

**Fig. S1** Photographs of the gas diffusion layer.

#### **PFM details:**

The PFM is a wettable, resilient non-woven fabric with sufficient mechanical properties and sufficiently small pores. The fibers in the membrane are neutral and there are no polarity groups grafted on the main chains in fiber.<sup>S1</sup> Its photographs are showed in Fig. S2 and the corresponding physical parameters are listed in Table S1.

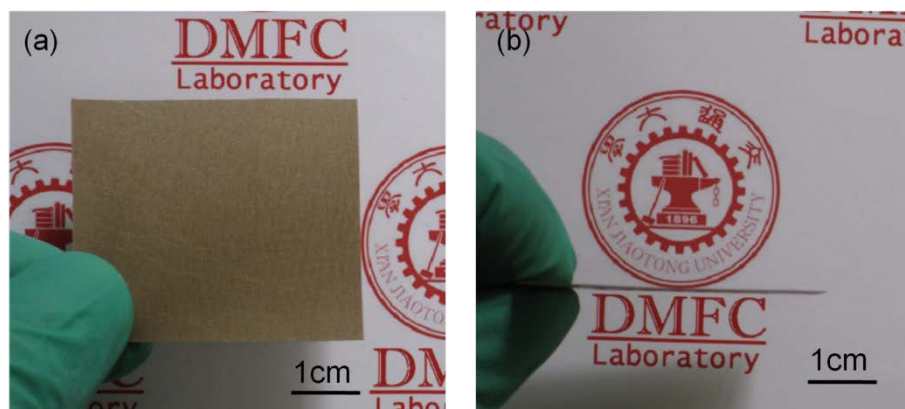

**Fig. S2** Photographs of the PFM.

**Table S1** The specification of PFM

| Specification *                  | Units               | Value         |
|----------------------------------|---------------------|---------------|
| Basis weight                     | g/m <sup>2</sup>    | 51.4          |
| Thickness <sup>1</sup>           | Microns             | 115.8         |
| MD <sup>2</sup> Tensile Strength | N/15mm              | 49.8          |
| MD Elongation                    | %                   | 12.4          |
| Average pore size                | Microns             | 9             |
| Electrolyte holding ratio        | %                   | 144 (30% KOH) |
| Electrolyte wicking rate         | mm/10min            | 72(30% KOH)   |
| Air resistance                   | sec/100mL           | 5.0           |
| S Content                        | %                   | 0.88          |
| Cost                             | US\$/m <sup>2</sup> | 3-4           |

*\* The information is provided by Nippon Kodoshi Corporation.*

*<sup>1</sup>/Thickness is measured with “Dead Weight Micrometer (ISO534)”.*

*<sup>2</sup>/MD = machine direction*

**Nafion-117 membrane details:**

**Table S2** The specification of Nafion-117

| Specification <sup>*</sup>                | Units               | Value              |
|-------------------------------------------|---------------------|--------------------|
| Basis weight                              | g/m <sup>2</sup>    | 360                |
| Typical Thickness                         | Microns             | 183                |
| MD <sup>1</sup> Tensile Strength, maximum | MPa                 | 43 (50% RH, 23°C)  |
| MD Elongation at break                    | %                   | 225 (50% RH, 23°C) |
| Water content <sup>2</sup>                | %                   | 5                  |
| Water uptake <sup>3</sup>                 | %                   | 38                 |
| Conductivity                              | S/cm                | 0.083              |
| Cost                                      | US\$/m <sup>2</sup> | 790 <sup>S2</sup>  |

*<sup>\*</sup>The information is provided by DuPont Company.*

*<sup>1</sup>/MD = machine direction*

*<sup>2</sup>/Water content of membrane conditioned to 23°C, 50% relative humidity (RH), compared to dry weight basis.*

*<sup>3</sup>/Water uptake from dry membrane to water soaked at 100°C for 1 hour (dry weight basis).*

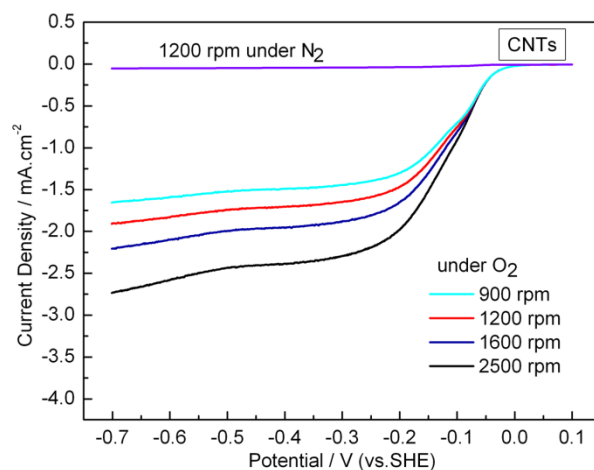

**Fig. S3** Linear scan voltammograms for ORR on CNTs in  $\text{N}_2$ - and  $\text{O}_2$ -saturated 1M KOH solutions at different rotation rates, respectively. Scan rate:  $5\text{mV.s}^{-1}$ .

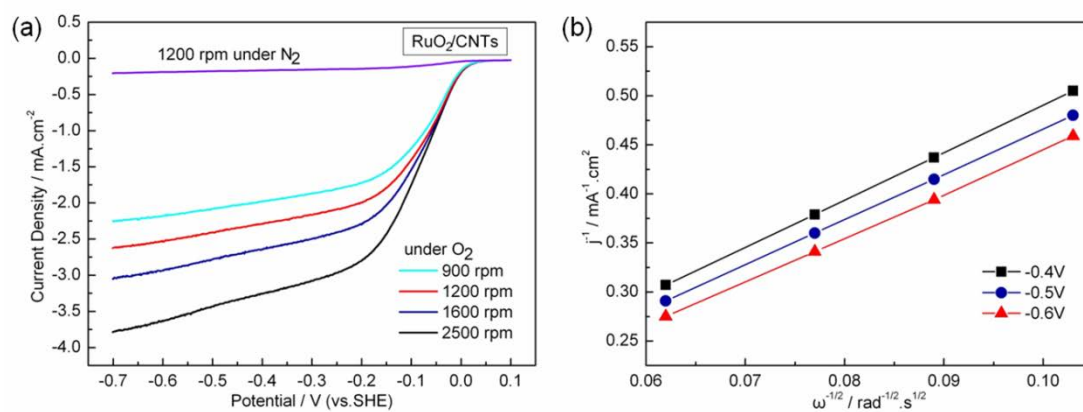

**Fig. S4** (a) Linear scan voltammograms for ORR on  $\text{RuO}_2/\text{CNTs}$  catalyst in  $\text{N}_2$ - and  $\text{O}_2$ -saturated 1M KOH solutions at different rotation rates, respectively; (b) the corresponding Koutecky-Levich plots at different electrode potentials. Scan rate:  $5\text{mV.s}^{-1}$ .

## The O<sub>2</sub> reduction kinetics of RuO<sub>2</sub>/CNTs:

Koutecky-Levich equation was used to analyze the kinetic parameters:<sup>S3</sup>

$$\frac{1}{j} = \frac{1}{j_k} + \frac{1}{j_{diff}} = \frac{1}{j_k} + \frac{1}{B\omega^{1/2}}$$

Where

$$B = 0.62nFC_oD_o^{2/3}\nu^{-1/6}$$

here,  $j$  is the measured current density,  $j_k$  is the kinetic current density,  $j_{diff}$  is the diffusion limited current density,  $\omega$  is the electrode rotation rate (rad.s<sup>-1</sup>),  $n$  is the overall number of electrons transferred in O<sub>2</sub> reduction,  $F$  is Faraday constant (96500 C.mol<sup>-1</sup>),  $C_o$  is the saturated concentration of O<sub>2</sub> in the electrolyte (0.843×10<sup>-6</sup> mol.cm<sup>-3</sup>),  $D_o$  is the diffusion coefficient of O<sub>2</sub> in the solution (1.43×10<sup>-5</sup> cm<sup>2</sup>.s<sup>-1</sup>), and  $\nu$  is the kinematic viscosity of the electrolyte (0.01128 cm<sup>2</sup>.s<sup>-1</sup>).<sup>S4</sup> In the  $j^{-1}$  versus  $\omega^{-1/2}$  plot, the slope is  $1/B$ . Using the so-called  $B$  factor, the number of electrons transferred ( $n$ ) can be obtained. By this method, we get the transferred electron number per O<sub>2</sub> on RuO<sub>2</sub>/CNTs,  $n=3.6$ , which nearly approached the complete reduction of O<sub>2</sub> to OH<sup>-</sup>, a four-electron process.

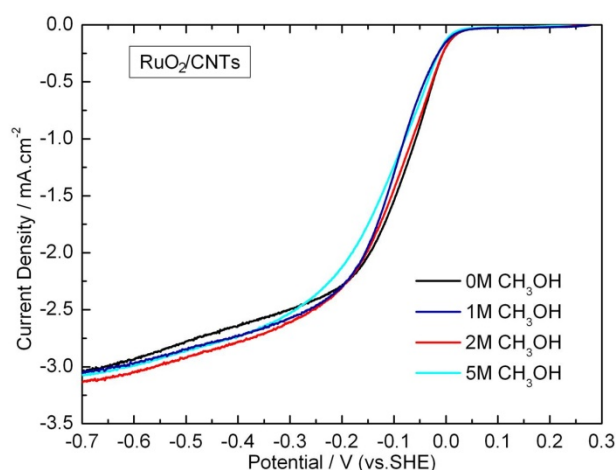

**Fig. S5** Linear scan voltammograms for ORR on RuO<sub>2</sub>/CNTs catalyst in O<sub>2</sub>-saturated 1M

KOH electrolyte containing 0, 1, 2, and 5M methanol at a rotation rate of 1600 rpm. Scan rate:

$$5\text{mV.s}^{-1}.$$

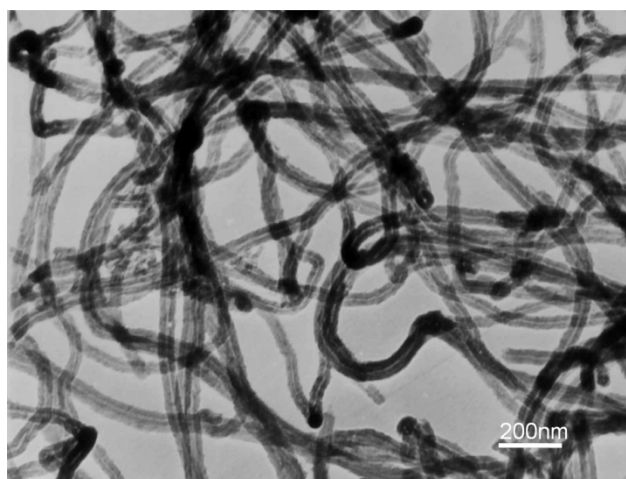

**Fig. S6** TEM image of the CNTs.

**References:**

- S1 X. Yang, Y. Liu, S. Li, X. Wei, L. Wang and Y. Chen, *Sci. Rep.*, 2012, **2**,567; DOI: 10.1038/srep00567.
- S2 V. Neburchilov, J. Martin, H. Wang and J. Zhang, *J. Power Sources*, 2007, **169**, 221-238.
- S3 M.-R. Gao, Q. Gao, J. Jiang, C.-H. Cui, W.-T. Yao and S.-H. Yu, *Angew. Chem., Int. Edit.*, 2011, **123**, 5007-5010.
- S4 I. Roche, E. Chaînet, M. Chatenet and J. Vondrák, *J. Phys. Chem. C*, 2006, **111**, 1434-1443.
